# Supplementary material for: Standardized Computer-based Organized Reporting of EEG: SCORE
Source: PubMed Central journal article supplement (PMC3759702; doi:10.1111/epi.12135), 2013-03-18
Supplement: epi0054-1112-SD3.pdf [file epi0054-1112-SD3.pdf]

## Definitions of the terms in the sleep element of SCORE

| Term                                                  | Definition                                                                                                                                                                                                                                                                                                                                                                                                                                           |
|-------------------------------------------------------|------------------------------------------------------------------------------------------------------------------------------------------------------------------------------------------------------------------------------------------------------------------------------------------------------------------------------------------------------------------------------------------------------------------------------------------------------|
| Abnormal asymmetry or absence of sleep graphoelements | Absence or consistently marked amplitude asymmetry (>50%) of a normal sleep graphoelement.                                                                                                                                                                                                                                                                                                                                                           |
| Hypnagogic /hypnopompic hypersynchrony in children    | Bursts of bilateral, synchronous delta or theta activity of large amplitude, occasionally with superimposed faster components, occurring during falling asleep or during awakening, in children.                                                                                                                                                                                                                                                     |
| K complex                                             | A burst of somewhat variable appearance, consisting most commonly of a high voltage negative slow wave followed by a smaller positive slow wave frequently associated with a sleep spindle. Duration > 0.5 s. Amplitude is generally maximal in the frontal vertex. K complexes occur during non-REM sleep, apparently spontaneously, or in response to sudden sensory / auditory stimuli, and are not specific for any individual sensory modality. |
| Non-reactive sleep activity.                          | EEG activity consisting of normal sleep graphoelements, but which cannot be interrupted by external stimuli/ the patient cannot be waken.                                                                                                                                                                                                                                                                                                            |
| Normal sleep pattern                                  | Recording containing sleep-patterns that are considered normal for the attained sleep stages and for the age.                                                                                                                                                                                                                                                                                                                                        |
| Positive occipital sharp transient of sleep           | Sharp transient maximal over the occipital regions, positive relative to other areas, apparently occurring spontaneously during sleep. May be single or repetitive. Amplitude varies but is generally below 50 $\mu$ V.                                                                                                                                                                                                                              |
| Sleep architecture                                    | Only to be scored if whole-night sleep is part of the recording. It is a global descriptor of the structure and pattern of sleep: estimation of the amount of time spent in REM and NREM sleep, sleep duration, NREM-REM cycle.                                                                                                                                                                                                                      |
| Sleep onset rapid eye movement sleep (SOREM)          | Occurrence of REM (rapid eye movement) sleep within 15 minutes after sleep onset.                                                                                                                                                                                                                                                                                                                                                                    |
| Sleep spindles                                        | Burst at 11-15 Hz but mostly at 12-14 Hz generally diffuse but of higher voltage over the central regions of the head, occurring during sleep. Amplitude varies but is mostly below 50 $\mu$ V in the adult.                                                                                                                                                                                                                                         |
| Vertex sharp transient                                | Sharp potential, maximal at the vertex, negative relative to other areas, apparently occurring spontaneously during sleep or in response to a                                                                                                                                                                                                                                                                                                        |

|  |                                                                                                                                                                                                        |
|--|--------------------------------------------------------------------------------------------------------------------------------------------------------------------------------------------------------|
|  | <p>sensory stimulus during sleep or wakefulness. May be single or repetitive.<br/>Amplitude varies but rarely exceeds 250 <math>\mu</math>V. Abbreviation: V wave.<br/>Synonym: vertex sharp wave.</p> |
|--|--------------------------------------------------------------------------------------------------------------------------------------------------------------------------------------------------------|
